# Supplementary material
Source: PubMed Central journal article supplement (PMC4519694)
Supplement: NIHMS702154-supplement-2.pdf [file NIHMS702154-supplement-2.pdf]

## Supplementary Tables

| Monoamine    | Striatum    |             | Hippocampus |                | Frontal cortex |             |
|--------------|-------------|-------------|-------------|----------------|----------------|-------------|
|              | WT          | Cdk5 cKO    | WT          | Cdk5 cKO       | WT             | Cdk5 cKO    |
| <b>DA</b>    | 99.6 ± 2.75 | 90.2 ± 9.29 | 0.08 ± 0.01 | 0.16 ± 0.01 ** | 1.18 ± 0.34    | 1.22 ± 0.65 |
| <b>DOPAC</b> | 4.80 ± 0.16 | 4.89 ± 0.31 | 0.09 ± 0.00 | 0.14 ± 0.01    | 0.33 ± 0.00    | 0.38 ± 0.09 |
| <b>HVA</b>   | 9.59 ± 0.24 | 9.26 ± 0.61 | 0.18 ± 0.01 | 0.29 ± 0.03 *  | 0.68 ± 0.06    | 0.70 ± 0.11 |
| <b>3-MT</b>  | 3.99 ± 0.17 | 4.12 ± 0.36 | 0.04 ± 0.00 | 0.06 ± 0.00    | 0.82 ± 0.36    | 0.59 ± 0.16 |
| <b>5-HT</b>  | 3.27 ± 0.15 | 3.40 ± 0.14 | 3.35 ± 0.06 | 3.20 ± 0.18    | 1.94 ± 0.06    | 1.73 ± 0.16 |

**Supplementary Table 1.** Monoamine levels in striatum, hippocampus and frontal cortex of Cdk5 cKO and control mice. High-performance liquid chromatography (HPLC) analysis of striatal, hippocampal and frontal cortex tissue from Cdk5 cKO and control mice (WT  $n = 4$ ; cKO  $n = 6$ ). DA, dopamine; DOPAC, 3,4-dihydroxyphenylacetic acid; HVA, homovanilic acid; 3-MT, 3-methoxytyramine; 5-HT, serotonin. All values are indicated in nM per gram of tissue. All data shown are means ± s.e.m., \* $P < 0.05$ , \*\* $P < 0.01$ , \*\*\* $P < 0.001$ .

| Target/Ab Name                       | Company/Source                   | Catalogue number /Reference                                                                                                                                                   | Remark   |
|--------------------------------------|----------------------------------|-------------------------------------------------------------------------------------------------------------------------------------------------------------------------------|----------|
| Flag tag                             | <i>Cell Signaling Technology</i> | #8146                                                                                                                                                                         | Mab      |
| phospho-CREB (Ser133)                | <i>Cell Signaling Technology</i> | #9196                                                                                                                                                                         | Mab      |
| total CREB                           | <i>Cell Signaling Technology</i> | #9197                                                                                                                                                                         | Rab      |
| phospho-DARPP-32 (Thr34)             | <i>Cell Signaling Technology</i> | #12438                                                                                                                                                                        | Rab      |
| phospho-DARPP-32 (Thr75)             | <i>Cell Signaling Technology</i> | #2301                                                                                                                                                                         | Rab      |
| total DARPP-32                       | Hugh C. Hemmings                 | Hemmings & Greengard, <i>J Neurosci</i> 6, 1469-1481 (1986)                                                                                                                   | Mab      |
| Cdk5                                 | <i>PhosphoSolutions</i>          | 308-CDK5                                                                                                                                                                      | Mab      |
| phospho-GluR1 (Ser845)               | <i>PhosphoSolutions</i>          | p1160-845                                                                                                                                                                     | Rab      |
| total GluR1                          | <i>PhosphoSolutions</i>          | 895-GluR1                                                                                                                                                                     | Mab      |
| phospho-tyrosine hydroxylase (Thr40) | <i>PhosphoSolutions</i>          | p1580-40                                                                                                                                                                      | Rab      |
| total tyrosine hydroxylase           | <i>PhosphoSolutions</i>          | 2025-THRAB                                                                                                                                                                    | Rab      |
| Cdk5 (C-8)                           | <i>Santa Cruz</i>                | sc-173                                                                                                                                                                        | Rab      |
| p35 (C-19)                           | <i>Santa Cruz</i>                | sc-820                                                                                                                                                                        | Rab      |
| FITC                                 | <i>Abcam</i>                     | ab19224                                                                                                                                                                       | Goat ab  |
| NeuN                                 | Millipore                        | MAB377                                                                                                                                                                        | Mab      |
| PDE4A                                | Miles D. Housley                 | Huston et al, <i>J Biol Chem</i> 271, 31334-31344 (1996); Huston et al, <i>Biochem J</i> 328 (Pt2), 549-558 (1997); Bolger et al, <i>Biochem J</i> 328 (Pt2), 539-548 (1997). | Rab      |
| PDE4B                                | Miles D. Housley                 |                                                                                                                                                                               | Sheep ab |
| PDE4D                                | Miles D. Housley                 |                                                                                                                                                                               | Sheep ab |
| phospho-PDE4 (Cdk5)                  | James A. Bibb                    |                                                                                                                                                                               | Rab      |
| phospho-PDE4 (PKA)                   | James A. Bibb                    |                                                                                                                                                                               | Rab      |
| phospho-synapsin (Ser9)              | Sigma                            | S8067                                                                                                                                                                         | Rab      |
| Synapsin                             | Sigma                            | S193                                                                                                                                                                          | Rab      |
| $\beta$ -actin                       | Sigma                            | A2228                                                                                                                                                                         | Mab      |
| GAPDH                                | Sigma                            | G9545                                                                                                                                                                         | Rab      |

**Supplementary Table 2.** Primary antibodies used for immunoblotting and/or immunocytochemistry.
